# Supplementary material for: Comprehensive analysis of forty yeast microarray datasets reveals a novel subset of genes (APha-RiB) consistently negatively associated with ribosome biogenesis
Source: PubMed Central journal article supplement (PMC4262117; doi:10.1186/1471-2105-15-322), 2014-09-29

## **Supplementary Figure 1**

This Supplementary Figure provides the profiles of the genes included in the clusters C1 and C2 at the tightness levels of DTB with  $\delta = 0.3$  and  $0.2$  respectively. The profiles below are provided from all of the forty considered datasets.

### C1 – 257 genes

### C2 – 47 genes

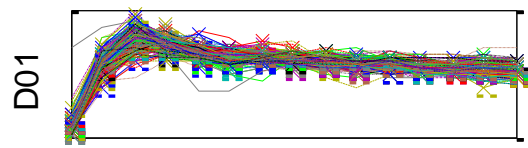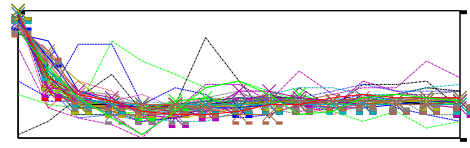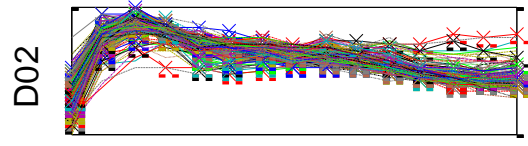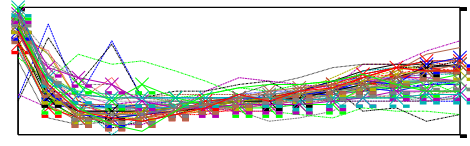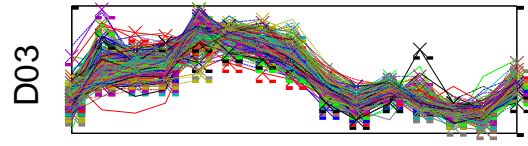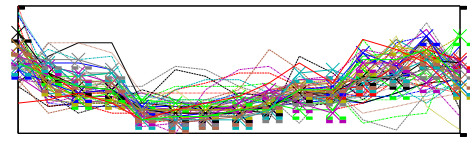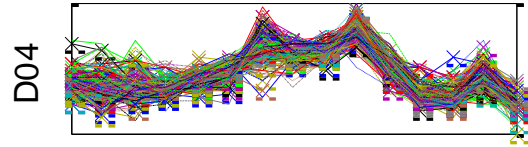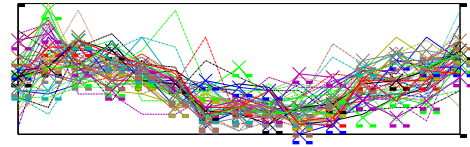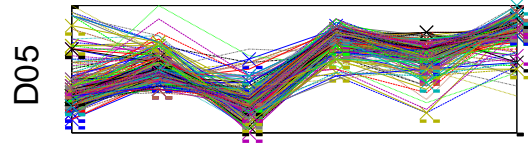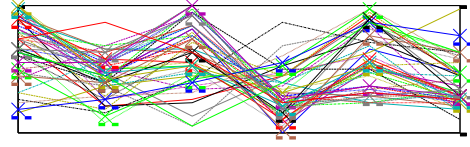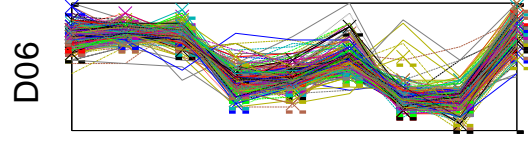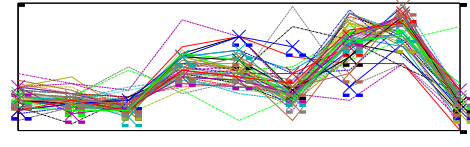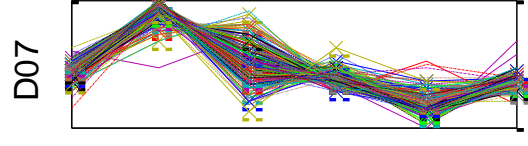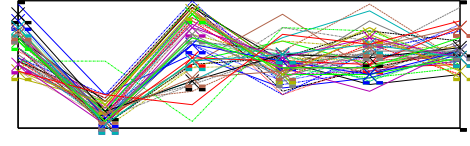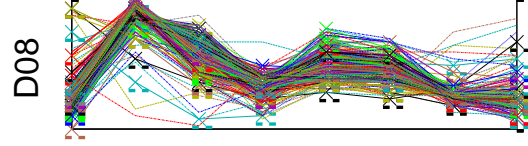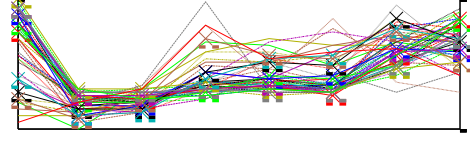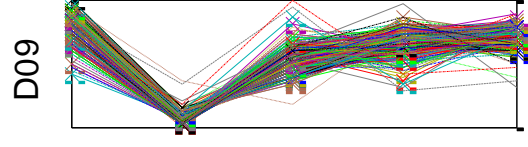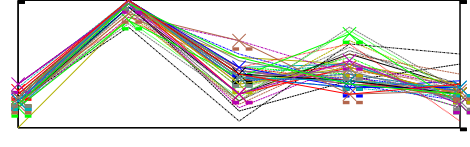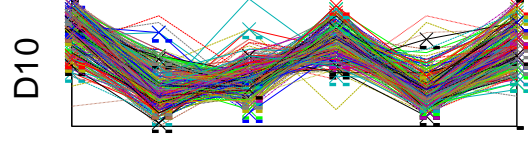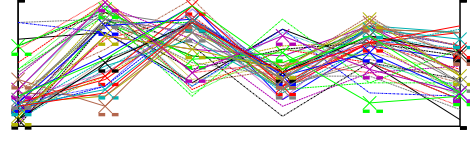

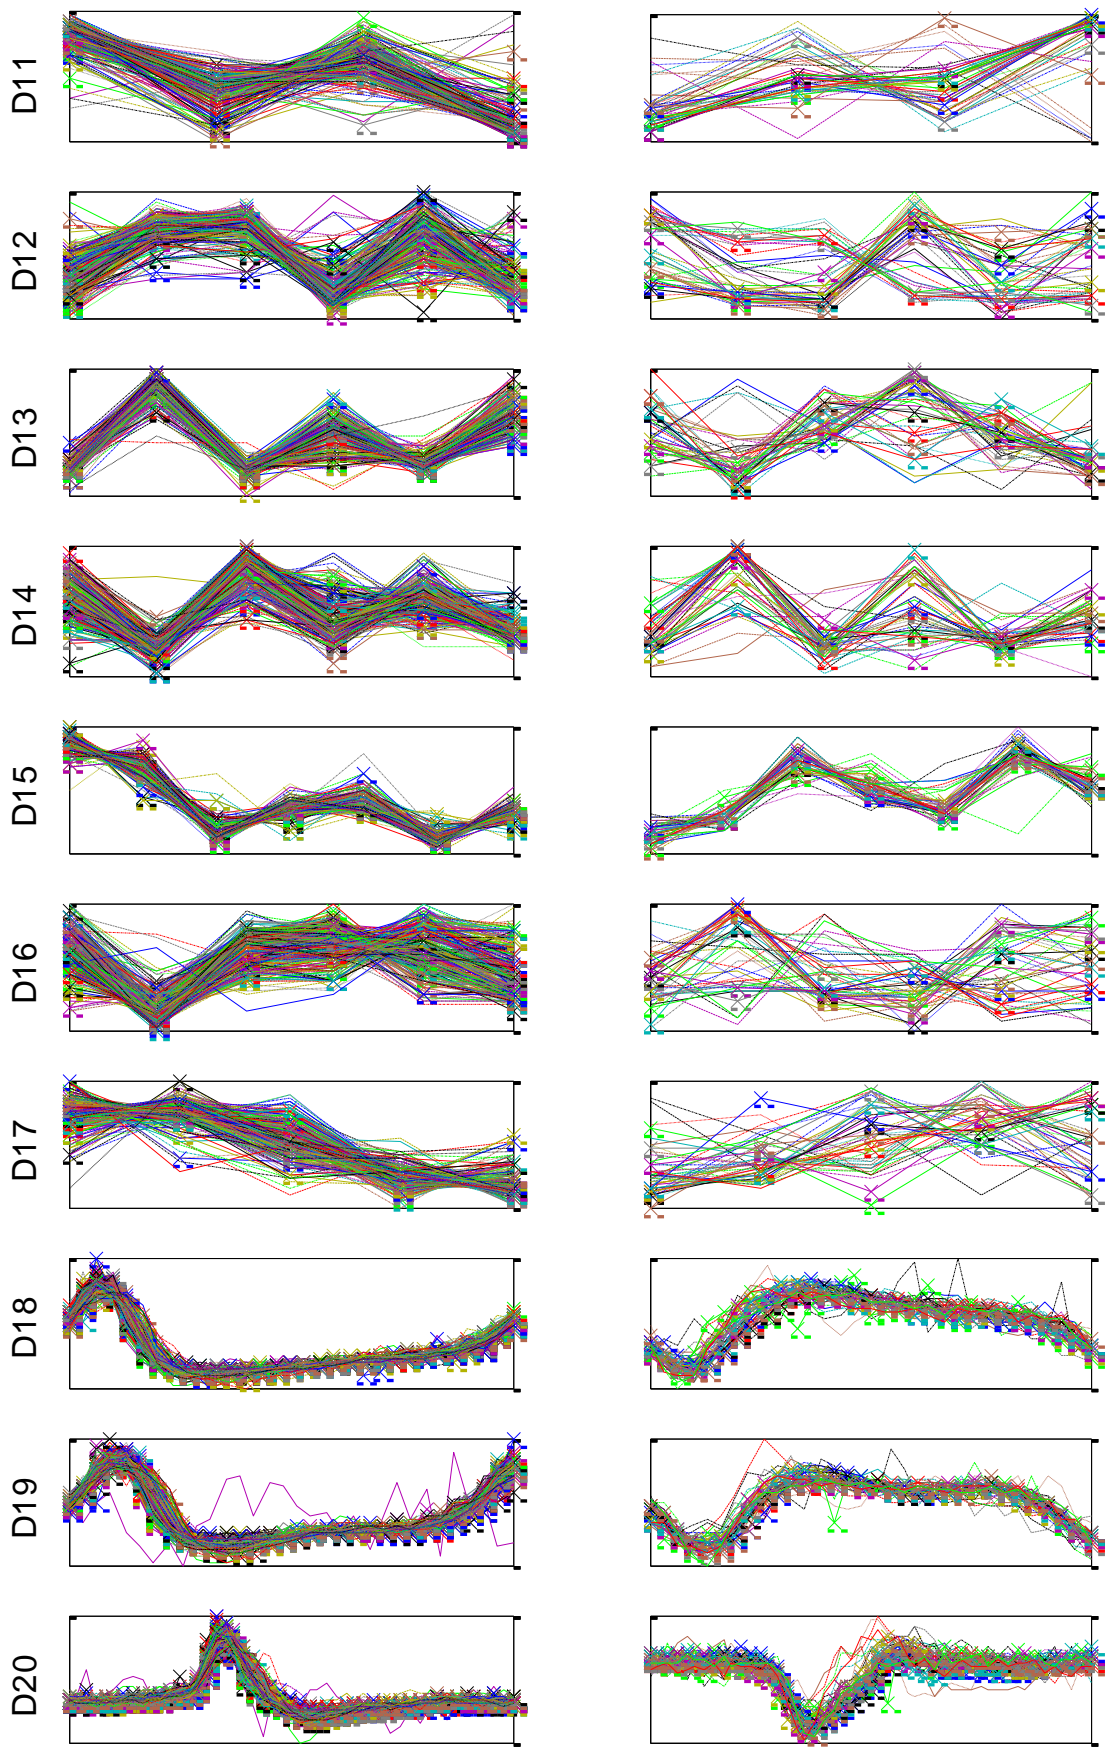

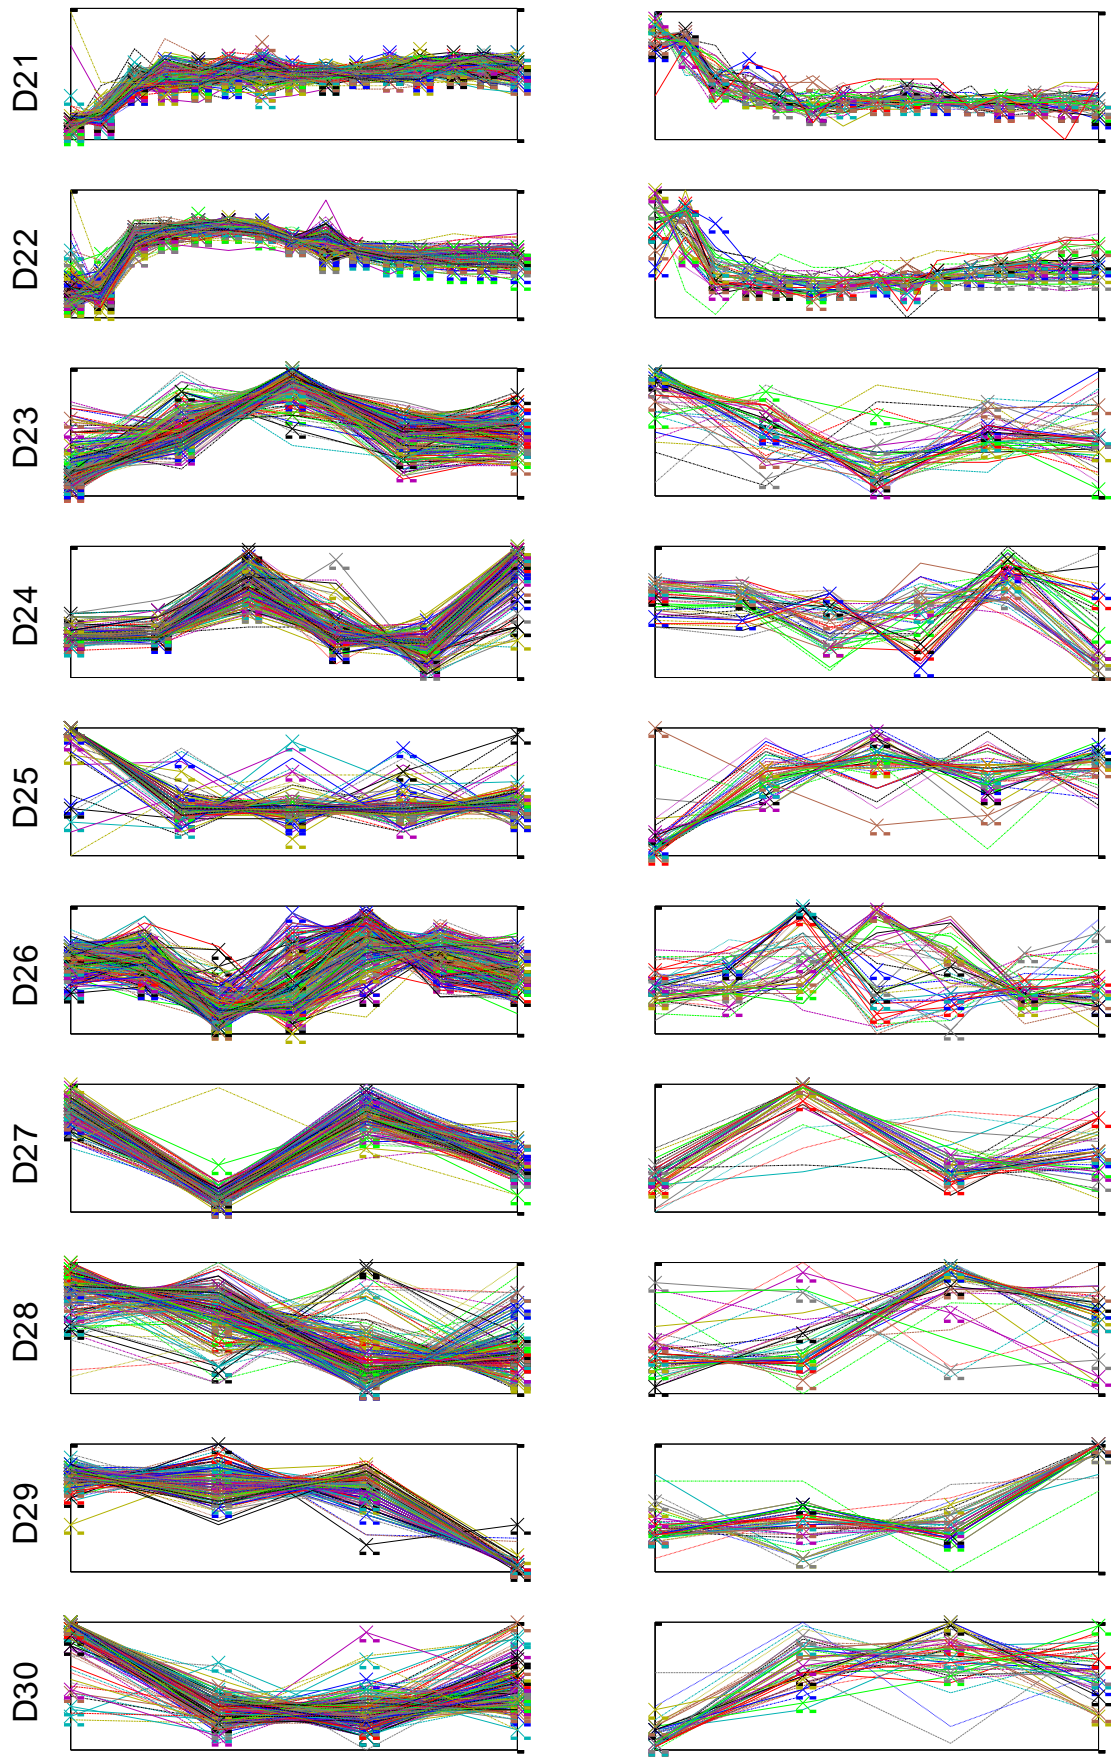

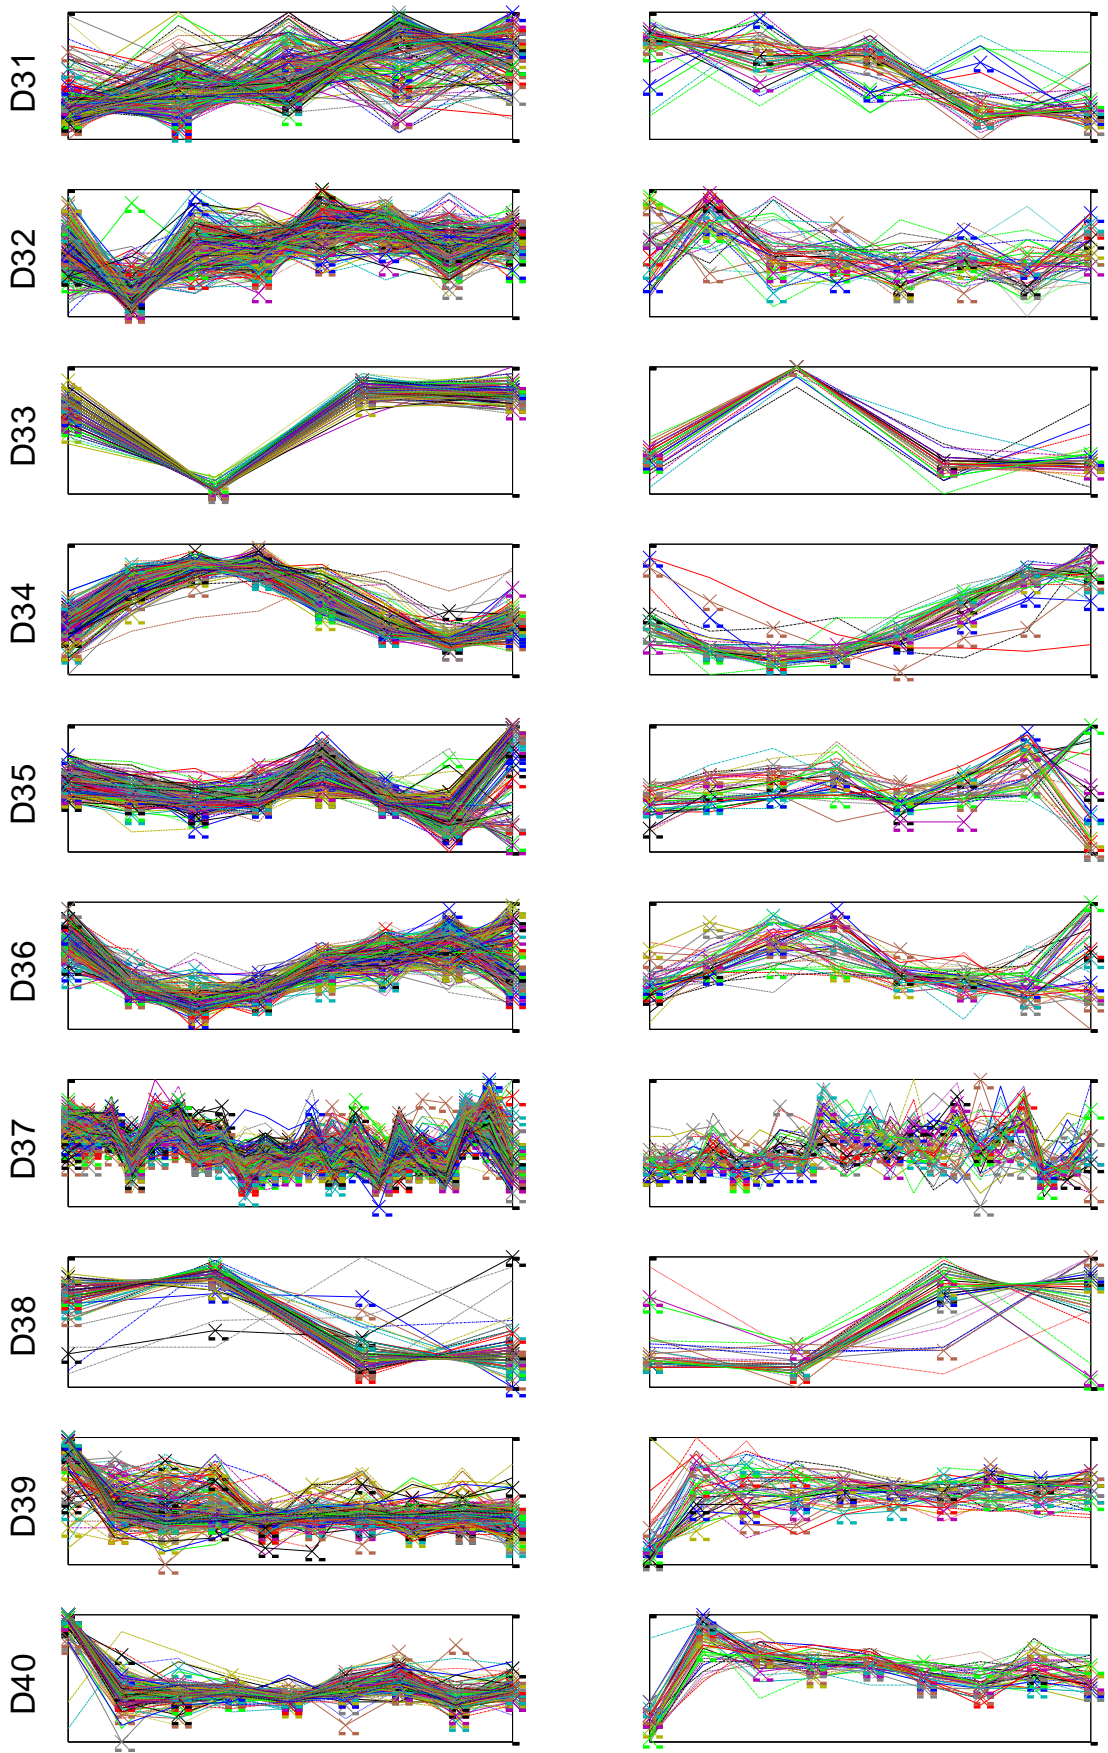

Supplement: 12859_2014_6633_MOESM2_ESM.pdf [file 12859_2014_6633_MOESM2_ESM.pdf]
