# Supplementary material for: Comprehensive analysis of forty yeast microarray datasets reveals a novel subset of genes (APha-RiB) consistently negatively associated with ribosome biogenesis
Source: PubMed Central journal article supplement (PMC4262117; doi:10.1186/1471-2105-15-322), 2014-09-29

# Supplementary Figure 2

C1 overlap with similar clusters in the literature, and the ratios of included genes associated with the “ribosome biogenesis” GO term.

## (Wade et al. 2006) – RRB regulon

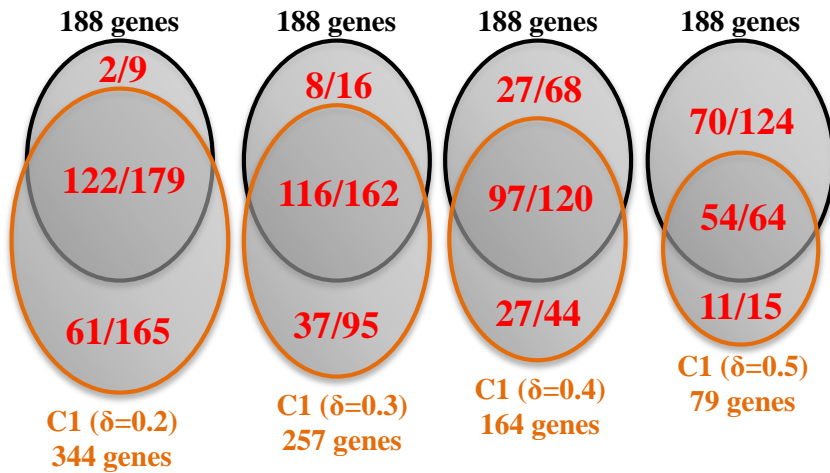

## (Brauer et al. 2008) – Positively correlated genes with growth

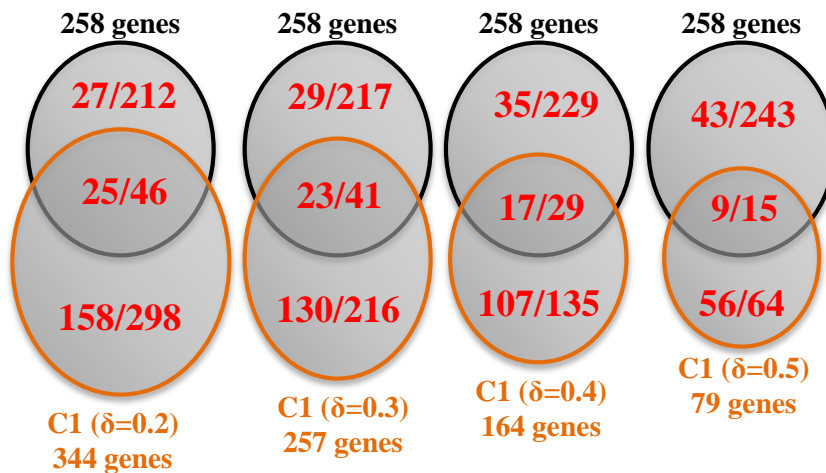

## (Roy et al. 2013) – Down-regulated genes with stress

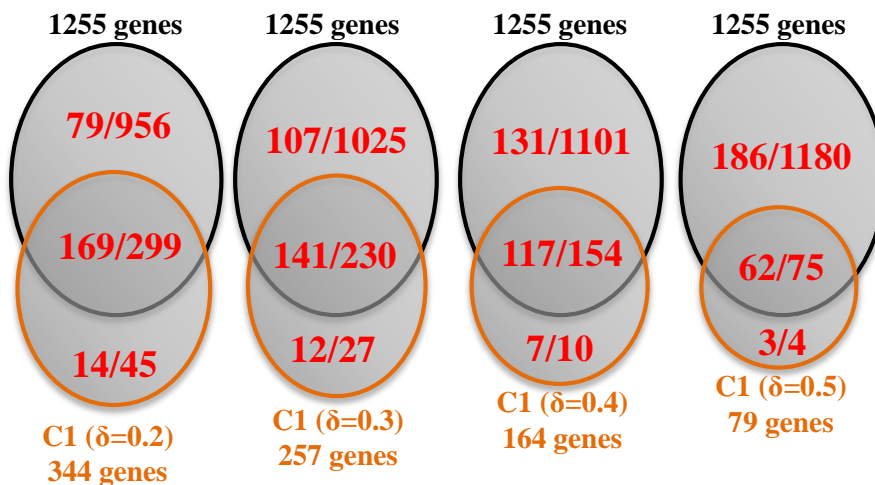

Supplement: 12859_2014_6633_MOESM6_ESM.pdf [file 12859_2014_6633_MOESM6_ESM.pdf]
